# Supplementary material for: Prevalence of Hyperhomocysteinemia in China: An Updated Meta-Analysis
Source: MDPI journal article supplement (doi:10.3390/biology10100959), 2021-09-26
Supplement: s1 [file s1]

**Supplementary Table S1.** Basic characteristics of studies on the prevalence of HHcy (defined as Hcy  $\geq 15\mu\text{mol/L}$ ) in China

| Authors       | Year of Publication | year of data collection | Population source            | Age (Years)   | Province  | Setting | Area | Study Location | Methods of Hcy measurement | Sample | Number of Cases | Prevalence of HHcy (%) | Prevalence of male (%) | Prevalence of female (%) |
|---------------|---------------------|-------------------------|------------------------------|---------------|-----------|---------|------|----------------|----------------------------|--------|-----------------|------------------------|------------------------|--------------------------|
| Pang2014[1]   | 2014                | 2011.5-2012.11          | Community-based              | 42.2±11.4     | Xinjiang  | R       | N    | I              | ECA                        | 1003   | 316             | 31.5                   | 49.9                   | 17.5                     |
| Wang2014[2]   | 2014                | NR                      | Community-based              | 54.05±12.11   | Guangdong | U       | S    | Co             | ECA                        | 1586   | 270             | 17.02                  | 29.6                   | 8.47                     |
| Liu2014[3]    | 2014                | 2012.08-2013.09         | Physical examination - based | 43.04 ± 10.24 | Jilin     | U and R | N    | I              | ECA                        | 1106   | 200             | 18.1                   | NR                     | NR                       |
| Liu2015[4]    | 2015                | 2007                    | Community-based              | 43.57         | Shanxi    | U and R | N    | I              | ECA                        | 2645   | 1791            | 67.7                   | 81.4                   | 58.8                     |
| Zhang2015[5]  | 2015                | 2009                    | Community-based              | 69.5±8.1      | Beijing   | U       | N    | I              | ECA                        | 1458   | 902             | 61.87                  | NR                     | NR                       |
| Deng2015[6]   | 2015                | NR                      | Community-based              | 72.96± 7.66   | Shanghai  | R       | C    | Co             | HPLC                       | 1621   | 569             | 35.1                   | 43.6                   | 29.5                     |
| Wang2016[7]   | 2016                | 2013.1-2013.12          | Physical examination - based | 49.1±11.7     | Guangdong | U and R | S    | Co             | IA                         | 1136   | 575             | 50.61                  | 65.61                  | 27.78                    |
| Wu2016a[8]    | 2016                | 2013.1-2014.10          | Physical examination - based | 45.86 ±13.53  | Sichuan   | U and R | C    | I              | ECA                        | 11740  | 3393            | 28.9                   | 40.53                  | 8.77                     |
| Wu2016b[9]    | 2016                | 2014.1                  | Physical examination - based | 38.0±8.6      | Shanghai  | U and R | C    | Co             | ECA                        | 438    | 125             | 28.54                  | NR                     | NR                       |
| Zhang2016[10] | 2016                | 2012.8-2012.12          | Community-based              | 64.6±7.4      | Shanxi    | R       | N    | I              | ECA                        | 2355   | 1710            | 72.6                   | 84.3                   | 63.2                     |
| Chen2017[11]  | 2017                | 2012.7-2013.8           | Community-based              | 53.8±10.6     | Liaoning  | R       | N    | I              | ECA                        | 7365   | 2944            | 39.97                  | 59.04                  | 25.79                    |
| Zhan2017[12]  | 2017                | 2012.8-2012.12          | Community-based              | 63.68         | Shanxi    | U       | N    | I              | ECA                        | 516    | 250             | 48.4                   | NR                     | NR                       |
| Wei2017[13]   | 2017                | 2015-2016               | Community-based              | ≥35           | Guangxi   | R       | S    | Co             | ECA                        | 600    | 214             | 35.7                   | 40.4                   | 28.1                     |

| Author        | Year | Time            | Method                       | Age         | Region       | Study Design | Design | Control | Outcome | Prevalence | Incidence | Prevalence Ratio | Incidence Ratio | OR    |
|---------------|------|-----------------|------------------------------|-------------|--------------|--------------|--------|---------|---------|------------|-----------|------------------|-----------------|-------|
| Yang2018[14]  | 2018 | 2013-2018       | Physical examination - based | 54.8±7.9    | Hunan        | U and R      | C      | Co      | NR      | 207069     | 82701     | 39.94            | 55.6            | 16.7  |
| Qin2018[15]   | 2018 | 2015-2016       | Physical examination - based | ≥20         | Guangxi      | U and R      | S      | Co      | ECA     | 8043       | 4086      | 50.8             | 52.3            | 48.1  |
| Chen2018[16]  | 2020 | 2016.08-2016.09 | Community-based              | 61.2±9.5    | Jiangsu      | U            | C      | Co      | ECA     | 16644      | 5018      | 30.15            | 43.65           | 22.31 |
| Wang2019[17]  | 2019 | 2013            | Community-based              | 55.7 ± 11.1 | Shanghai     | U and R      | C      | Co      | ECA     | 8337       | 2059      | 24.7             | NR              | NR    |
| Cao2019[18]   | 2019 | 2015.07-2017.12 | Physical examination - based | NR          | Chongqing    | U and R      | C      | I       | ECA     | 7308       | 1237      | 16.93            | 90.54           | 5.6   |
| Jiang2019[19] | 2019 | 2007            | Community-based              | 35-64       | Jiangxi      | R            | C      | I       | ECA     | 3886       | 1542      | 39.68            | 49.61           | 24.14 |
| Tan2019[20]   | 2019 | 2015            | Physical examination - based | 72.57±6.51  | Shanghai     | U and R      | C      | Co      | ECA     | 5976       | 2487      | 41.62            | 51.47           | 33.82 |
| Zhang2019[21] | 2019 | NR              | Physical examination - based | 61.91±7.26  | Heilongjiang | U            | N      | I       | ELISA   | 668        | 200       | 29.94            | 25.99           | 33.72 |
| Zhao2019[22]  | 2019 | 2017.01         | Physical examination - based | 59.8±9.8    | Xinjiang     | U and R      | N      | I       | NR      | 7492       | 4745      | 63.33            | 74.23           | 54.46 |
| Deng2020[23]  | 2020 | 2017.07-2018.10 | Physical examination - based | 50.37±6.09  | Guangxi      | U and R      | S      | Co      | ECA     | 1768       | 270       | 15.2             | 23.1            | 6     |
| Wang2020[24]  | 2020 | 2018.01-2018.06 | Physical examination - based | 58.15±11.74 | Hebei        | U            | N      | I       | NR      | 2572       | 724       | 28.15            | NR              | NR    |
| Yu2020[25]    | 2020 | 2001.01-2003.08 | Community-based              | 54 ± 10     | Liaoning     | R            | N      | Co      | ECA     | 6837       | 2824      | 41.3             | NR              | NR    |
| Cui2020[26]   | 2020 | 2016.06-2017.11 | Community-based              | 20-74       | Shanghai     | U            | C      | Co      | ECA     | 8201       | 2673      | 32.59            | 52.69           | 18.6  |
| Niu2021[27]   | 2021 | 2013-2014       | Community-based              | 54.5        | Hunan        | U and R      | C      | Co      | NR      | 4012       | 1420      | 35.39            | 45.38           | 28.46 |

|             |      |                 |                              |           |           |         |   |    |       |       |      |       |    |    |
|-------------|------|-----------------|------------------------------|-----------|-----------|---------|---|----|-------|-------|------|-------|----|----|
| Guo2021[28] | 2021 | 2012.03-2015.07 | Community-based              | 57.5±10.9 | Guangdong | U       | S | Co | NR    | 15808 | 2739 | 17.33 | NR | NR |
| Liu2021[29] | 2021 | 2014.04-2015.04 | Physical examination - based | 40±8.4    | Sichuan   | U and R | C | I  | ELISA | 470   | 163  | 34.68 | NR | NR |

HHcy, hyperhomocysteinemia; Hcy, homocysteine; NR, not reported; N, north; S, south; Ce, central; I, inland; Co, coastal; U, urban; R, rural; HPLC, high-performance liquid chromatography; ECA, enzymatic cycling assay; IA, immunoturbidimetric assays.

**Table S2. Quality scores for assessing the risk of bias of in the included articles for observation study.**

| Study(year)   | Q1 | Q2 | Q3 | Q4 | Q5 | Q6 | Q7 | Q8 | Q9 | Q10 | Q11 | Total Score |
|---------------|----|----|----|----|----|----|----|----|----|-----|-----|-------------|
| Pang2014[1]   | 1  | 0  | 1  | 1  | 1  | 0  | 1  | 1  | 0  | 1   | 1   | 8           |
| Wang2014[2]   | 1  | 1  | 1  | 1  | 1  | 0  | 1  | 0  | 0  | 1   | 1   | 8           |
| Liu2014[3]    | 1  | 0  | 1  | 1  | 1  | 0  | 0  | 0  | 0  | 0   | 1   | 5           |
| Liu2015[4]    | 1  | 1  | 1  | 1  | 1  | 0  | 1  | 1  | 0  | 1   | 1   | 9           |
| Zhang2015[5]  | 1  | 1  | 1  | 1  | 1  | 0  | 1  | 1  | 0  | 1   | 1   | 9           |
| Deng2015[6]   | 1  | 0  | 0  | 1  | 1  | 0  | 0  | 0  | 0  | 1   | 1   | 5           |
| Wang2016[7]   | 1  | 1  | 1  | 1  | 1  | 0  | 0  | 0  | 0  | 0   | 1   | 6           |
| Wu2016a[8]    | 1  | 0  | 1  | 1  | 1  | 0  | 0  | 0  | 0  | 0   | 1   | 5           |
| Wu2016b[9]    | 1  | 1  | 1  | 1  | 1  | 0  | 1  | 0  | 0  | 1   | 1   | 8           |
| Zhang2016[10] | 1  | 1  | 1  | 1  | 1  | 0  | 1  | 0  | 0  | 1   | 1   | 8           |
| Chen2017[11]  | 1  | 1  | 1  | 1  | 1  | 0  | 0  | 1  | 0  | 1   | 1   | 8           |
| Zhan2017[12]  | 1  | 1  | 1  | 1  | 1  | 0  | 1  | 1  | 0  | 1   | 1   | 9           |
| Wei2017[13]   | 1  | 1  | 1  | 1  | 1  | 0  | 0  | 0  | 0  | 0   | 1   | 6           |
| Yang2018[14]  | 1  | 1  | 1  | 1  | 1  | 0  | 0  | 0  | 0  | 0   | 1   | 6           |
| Qin2018[15]   | 1  | 1  | 1  | 1  | 1  | 0  | 0  | 1  | 0  | 0   | 1   | 7           |

|               |   |   |   |   |   |   |   |   |   |   |   |   |
|---------------|---|---|---|---|---|---|---|---|---|---|---|---|
| Chen2018[16]  | 1 | 1 | 1 | 1 | 1 | 0 | 0 | 0 | 0 | 0 | 1 | 6 |
| Wang2019[17]  | 1 | 1 | 1 | 1 | 1 | 0 | 0 | 1 | 0 | 0 | 1 | 7 |
| Cao2019[18]   | 1 | 1 | 1 | 1 | 1 | 0 | 0 | 1 | 0 | 0 | 1 | 7 |
| Jiang2019[19] | 1 | 0 | 1 | 1 | 1 | 0 | 0 | 0 | 0 | 0 | 1 | 5 |
| Tan2019[20]   | 1 | 0 | 1 | 1 | 1 | 0 | 1 | 0 | 0 | 1 | 1 | 7 |
| Zhang2019[21] | 1 | 1 | 0 | 1 | 1 | 0 | 1 | 0 | 0 | 1 | 1 | 7 |
| Zhao2019[22]  | 1 | 1 | 1 | 1 | 1 | 0 | 0 | 0 | 0 | 0 | 1 | 6 |
| Deng2020[23]  | 1 | 1 | 1 | 1 | 1 | 0 | 0 | 1 | 0 | 0 | 1 | 7 |
| Wang2020[24]  | 1 | 1 | 1 | 1 | 1 | 0 | 1 | 0 | 0 | 1 | 1 | 8 |
| Yu2020[25]    | 1 | 1 | 1 | 1 | 1 | 0 | 1 | 1 | 0 | 1 | 1 | 9 |
| Cui2020[26]   | 1 | 1 | 1 | 1 | 1 | 0 | 1 | 1 | 0 | 1 | 1 | 9 |
| Niu2020[27]   | 1 | 1 | 1 | 1 | 1 | 0 | 1 | 1 | 0 | 1 | 1 | 9 |
| Guo2021[28]   | 1 | 1 | 1 | 1 | 1 | 0 | 0 | 1 | 0 | 1 | 1 | 8 |
| Liu2021[29]   | 1 | 1 | 1 | 1 | 1 | 0 | 0 | 0 | 0 | 0 | 1 | 6 |

“No” or “Unclear” was scored “0”, and “Yes” was scored “1”. Low quality:  $\leq 3$  scores; Moderate quality: 4-7 scores; High quality:  $\geq 8$  scores. Q1: Define the source of information (survey, record review); Q2: List inclusion and exclusion criteria for exposed and unexposed subjects (cases and controls) or refer to previous publications; Q3: Indicate time period used for identifying patients; Q4: Indicate whether or not subjects were consecutive if not population-based; Q5: Indicate if evaluators of subjective components of study were masked to other aspects of status of the participants; Q6: Describe any assessments undertaken for quality assurance purpose; Q7: Explain any patient exclusions from analysis; Q8: Describe how confounding was assessed and/or controlled; Q9: If applicable, explain how missing data were handled in the analysis; Q10: Summarize patient response rates and completeness of data collection; Q11: Clarify what follow-up, if any, was expected and the percentage of patients for which incomplete data or follow-up was obtained.

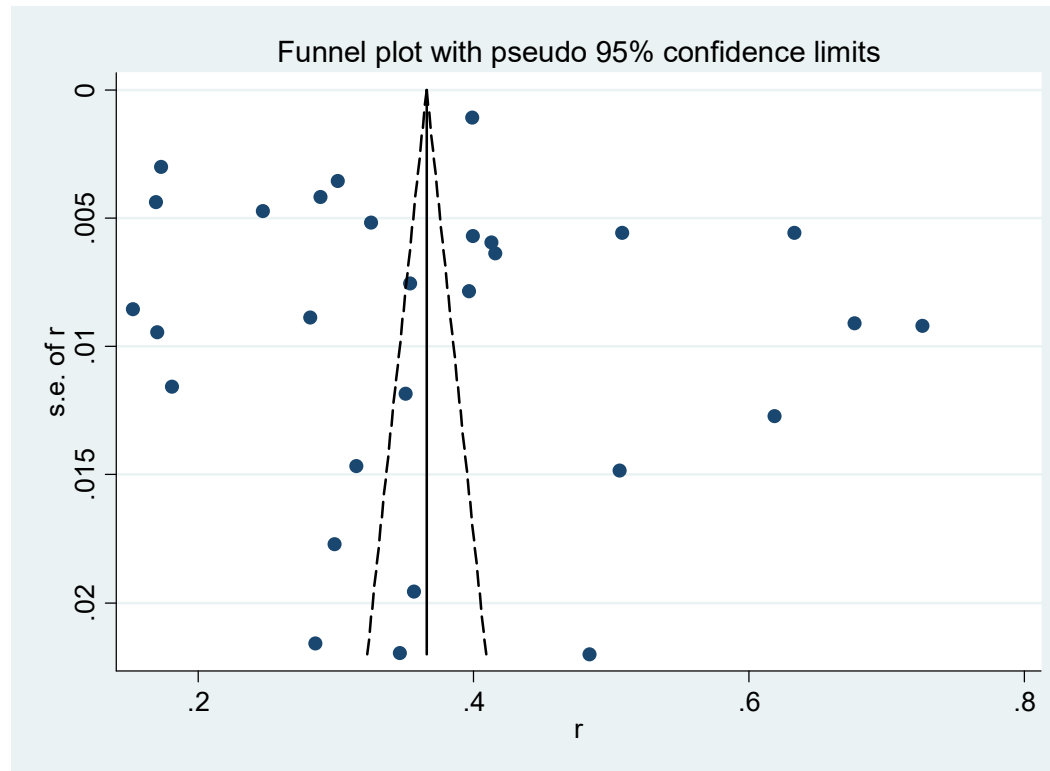

Supplementary Figure S1. Funnel chart

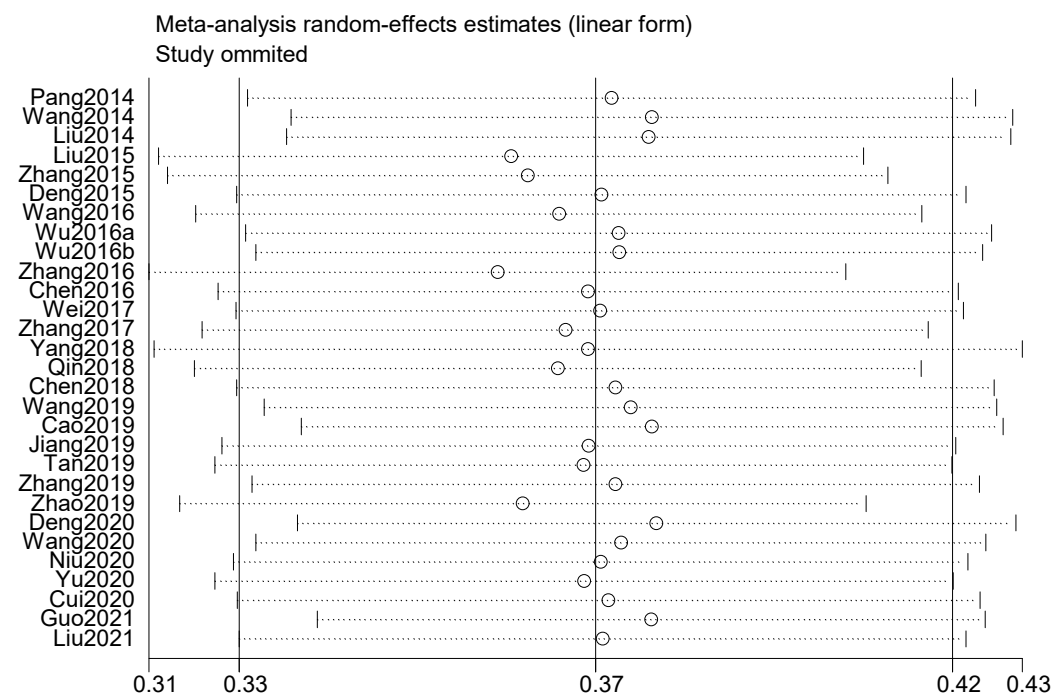

Supplementary Figure S2. Sensitivity analyses

1. Pang,R.H.; Zhang,J.Y.; Xu,S.Z.; Ma,R.L.; Guo,H.; Liu,J.M.; Zhang,M.; Ding,Y.S.; Li,S.G.; Guo,S,X. The Epidemiological Characteristics of High Serum Level of Homocysteine in Kazakh Population at Xinyuan County of Xinjiang. *Chin Circ J*. 2014, 29, 913-916.
2. Wang,C.Y.; Zhang,T.; Chen,S.H.; Ma,J.P.; Liu,S.Y.; Peng,X.L.; Peng,J.; Xu,J.; Chen,Z.W. Study on the distribution of hyperhomocysteinemia and its influencing factors in healthy population of community in Nanshan Shenzhen. *J Trop Med*. 2014, 14, 1204-1208.
3. Liu, .R.; Jiang, W.X.; Song, C.X.; Zheng, W.M.; Tan L. Hyperhomocysteinemia and its associated risk factors in healthy subjects. *Chinese journal of clinical research*. 2014. 27. 637-638.
4. Liu, X.D.; Gao, B.; Sun, D.; Shi, M.;Ma, Y.Y.; Liu, Z.R.; Wang, B.; Xu, X.; Xu, X.; Ji, Q.H.; Zhao, G. Prevalence of hyperhomocysteinaemia and some of its major determinants in Shaanxi Province, China: a cross-sectional study. *Br J Nutr*. 2015, 113, 691-698. <http://doi.org/10.1017/s0007114514004218>
5. Zhang,Z.Y.;Fang,X.H.;Jie,X.H.;Tang,Z.;Guan,S.C.;Liu,H.J.;Wu,X.G.;Wang,C.X.;Hou,C.B.;Gu,X.The association between serum homocysteine and blood pressure among middle-aged and elderly people. *Chin J hypertens*. 2015, 23, 846-850.
6. Deng,Q.Q.;Gao,L.L.;Fu,J.H.; Pan,D.H.; Xiao,W.Z.; Li,Q.H.; Ding,D.; Pan,X.J.; Yu,B. The prevalence and risk factors of hyperhomocysteinemia in elderly people in rural community of Shanghai. *Fudan Univ J Med Sci*. 2015, 42, 722-726.
7. Wang,J.F.; Ma,X.T.; Liu,G.Z.; Xie,T.; Xie,Y.L. The characteristic of total plasma total homocysteine level distribution in population of Zhaihai area. *Chongqing Med J*. 2016, 45, 3972-3974.xx
8. Wu,Q.Q.; Tang,H.R.; Tang,G.H.; Li,Q.; Xue,G.C.; Chen,Y.; Leng,R.;Wang,Y.J. The Cross-sectional Survey of the Serum Homocysteine in Chengdu Area. *Sichuan Med J*. 2016, 37, 783-787.
9. Wu,Y,Z; Lu,D.R.; Chen,X.X.; Jiang,Y.M. Correlation of homocysteine levels with gene polymorphisms of metabolic enzyme in 438 adults taking physical examination in Shanghai,china.*Acad J Second Military Med Univ*. 2016, 37, 936-942.
10. Zhang, J.;Liu, T.T.;Zhang, W.;Li, Y.;Niu, X.Y.;Fang, Y.L.;Ma, L.S.;Li, C.X. Hyperhomocysteinemia Is Associated with Vitamin B-12 Deficiency: A Cross-sectional Study in a Rural, Elderly Population of Shanxi China. *J Nutr Health Aging*. 2016, 20, 594-601. <http://doi.org/10.1007/s12603-015-0650-511>
11. Chen, S.;Guo, X.;Dong, S.;Li, Z.;Sun, Y. Relationship between lifestyle factors and hyperhomocysteinemia in general Chinese population: a cross-sectional study. *Postgrad Med*. 2017, 129, 216-223. <http://doi.org/10.1080/00325481.2017.1255126>
12. Zhang, H.; Shang, S.H.; Deng, M.Y.; Yan, F.; Li, Z.L., Chen, C.; Jiang, Y.; Dang, L.J.; Zhu, J.; Li, Y.; Qu, Q.M. Correlation between plasma homocysteine level and blood pressure in the high-risk population of stroke in the community of Xi'an. *Chinese Journal of Integrative Medicine on Cardio-Cerebrovascular Disease*. 2017,15, 3186-3193.

13. Wei,S.W.; Wei,Y.L.; Xun,W.H.; Wei,X.Y. Prevalence and Influencing Factors of Hyperhomocysteinemia in Baiku Yao Nationality Residents in Guangxi. *PJCCPVD*. 2017, 25, 73-75.
14. Yang,B.F. Correlation analysis between overweight and obesity and plasma homocysteine and blood lipid levels in healthy people. *Chin commun doc*. 2018, 34, 122-123.
15. Qin, Y.Y.;Wang, P.;Qin, J.Q.;Wei, A.Q.;Huang, P.;Lai, Z.F.;Lin, F.Q. Prevalence of hyperhomocysteinemia during routine physical examination in Guangxi Province, China and related risk factors. *J Clin Lab Anal*. 2018, 32. <http://doi.org/10.1002/jcla.22178>
16. Chen, L.;Wang, B.;Wang, J.;Ban, Q.;Wu, H.;Song, Y.;Zhang, J.;Cao, J.;Zhou, Z.;Liu, L.;Cao, T.;Gao, L.;Guo, H.;Zhang, T.;Tang, G.;Huang, X.;Zhang, Y.;Li, J.;Huo, Y.;Cheng, X.;Zang, T.;Xu, X.;Zhang, H.;Qin, X. Association between serum total homocysteine and arterial stiffness in adults: a community-based study. *J Clin Hypertens (Greenwich)*. 2018, 20, 686-693. <http://doi.org/10.1111/jch.13246>
17. Wang, Y.H.;Yan, Q.H.;Xu, J.Y.;Li, X.J.;Cheng, M.N. High Prevalence and Factors Contributing to Hyperhomocysteinemia, Folate Deficiency, and Vitamin B12 Deficiency among Healthy Adults in Shanghai, China. *Biomed Environ Sci*. 2019, 32, 63-67. <http://doi.org/10.3967/bes2019.010>
18. Cao,Y.;Li,B.;He,J.T.; Yue,Y.; Wang,X.H.; Chen,Y.; Jia,S.Y. The relationship between serum homocysteine level and changes of cerebral hemodynamic indexes. *Chongqing Med J*. 2019, 48, 1225-1227+1230.
19. Jiang,L.X.; Dong,M.H.; Shi,S.H.; Zhang,H.J.; Li,S.M.; Xia,Y; Cao,J. The study of environmental factors for hyperhomocysteinemia in the population of Ganzhou. *J Gannan Med Univ*. 2019, 39, 762-765.
20. Tan,Q.; Wang,J.G.; Li,Y.; Wang,D.; Chen,Y.; Guo,H.Q. Clinical Characteristics of Hyperhomocysteinemia at Various Diagnostic Cut-off Thresholds. *Prevention and Treatment of Cardio-Cerebral-Vascular Disease*. 2019, 19, 292-295.
21. Zhang,Y.; Ying,X.;Guo,Y.p.; Chen,Y.L.; Wang,J.P.; Wang,Z.G. Analysis of influencing factors of homocysteine in middle-aged and elderly population. *J Harbin Med univ*. 2019, 53, 598-601.
22. Zhao,Y.; Shang,L.X.; Zhang,W.H.; Li,Y.D.; Zhou,X.H.;Tang,B.P. Correlation between metabolic syndrome components and hyperhomocysteinemia in residents with physical examination of Xinjiang area. *Chin J Prevent Control Chronic Dis*. 2019, 27, 425-427+431.
23. Deng,Z.K.; Ming,Y.; Li,H.B.; Lin,H.L.; Yang,J.; Bo,F. Analysis on the relationship between hyperhomocysteinemia and blood lipid and BMI in healthy people taking medical examination in Guilin . *Chinese Journal of Healthcare and Medicine*. 2020, 22, 599-602.
24. Wang,Z.L.; Zhang,X.M.; Hao,Z.H.; Nie,Q.; Liu,C.H.; Liu,X.X.;Wang,L.L. Relationship between serum homocysteine and metabolic syndrome in middle-aged and aged people of state-run institutions. *Pract Geriatr*. 2020, 34, 1165-1169.
25. Yu, S.;Chen, Y.;Yang, H.;Guo, X.;Zheng, L.;Sun, Y. Hyperhomocysteinemia accompany with metabolic syndrome increase the risk of left ventricular hypertrophy in



rural Chinese. BMC Cardiovasc Disord. 2020, 20, 44. <http://doi.org/10.1186/s12872-020-01350-2>

26. Cui,S.H.; Zhao,Q.; Wang,N.; Zhang,Y.; Qiu,Y.; Zhou,X.Y.; Yu,Y.T.; Wang,R.P.; Jiang,Y.G.; Zhao,G.M. Association between metabolic syndrome and its components with hyperhomocysteinemia in community population. Chin J Dis Control & Prev. 2020, 24, 1003-1008.
27. Niu, X.;Chen, J.;Wang, J.;Li, J.;Zeng, D.;Wang, S.;Hong, X. A Cross-sectional Study on the Relationship Between Homocysteine and Lipid Profiles Among Chinese Population from Hunan. Lipids. 2021, 56, 93-100. <http://doi.org/10.1002/lipd.12279>
28. Guo,Z.G.; Huang,J.Y.; Meng,R.W.; Shi,O.M.; Tie,X.H.; Mo,H.M.; Wang,Z.H. Correlation between high homocysteine and the risk of stroke in community residents aged 40 years and above in Shenzhen city. Chin J Health Manage . 2021, 15, 37-43. <http://doi.org/10.3760/cma.j.cn115624-20200527-00427>
29. Liu,X.Y.;Li,Y.;Liu,T. Correlation of homocysteine levels with gene polymorphisms of homocysteine metabolic enzymes in physical examination in Nan Chong. J of Pub Health and Prev Med. 2021, 32, 113-116.
